# Supplementary material for: Survey of UK histopathology consultants’ attitudes towards academic and molecular pathology
Source: PubMed Central journal article supplement — J Clin Pathol. 2019 Mar 25;72(6):399–405. doi: 10.1136/jclinpath-2018-205568 (PMC6580784; doi:10.1136/jclinpath-2018-205568), 2019-03-25
Supplement: jclinpath-2018-205568supp001.pdf [file jclinpath-2018-205568supp001.pdf]

## **Consultant Survey**

The CM-Path is an NCRI-sponsored initiative to improve academic and molecular pathology. This survey, sent to all UK consultant pathologists, will for the first time map the current landscape of academic and molecular pathology at consultant level. We need national coverage in order for the survey to shape the future of pathology. The survey will only take a few minutes to complete; please do complete it and encourage your colleagues to do the same. All results will be anonymised and treated confidentially. Thank you.

- What is your specialty? (*Select all that apply*)
  - a) Histopathology (Cellular Pathology)
  - b) Neuropathology
  - c) Paediatric pathology
  - d) Microbiology
  - e) Biochemistry
  - f) Haematology
  - g) Immunology
  - h) Toxicology
  - i) Virology
  - j) Veterinary pathology
  - k) Histocompatibility & Immunogenetics
  - l) Genetics & Reproductive science
  - m) Molecular pathology
  - n) Other, (please specify)
- Are you: (*Select all that apply*)
  - a) A Medically-qualified Consultant
  - b) A dentally-qualified Consultant
  - c) A Consultant Clinical Scientist
  - d) Other, (please specify)
- Which centre/organisation/University do you work for?

Open-ended response

- What type of centre is this? (*Select all that apply*)
  - a) District general hospital
  - b) Teaching hospital
  - c) University
  - d) Industry
- How long have you been a consultant for?

Open-ended response

## **Academic Pathology (Research)**

- Do you have any degrees other than your qualifying degree?
- a) N
- b) Y (please specify)
  - Do you have any peer-reviewed publications?
  - a) N
  - b) Y; How many?
    - Regarding research, which option best describes you:
      - a) Never involved in research
      - b) Previously involved in research, not currently research-active
      - c) Currently involved in research, but on an 'informal' basis (not allocated time to undertake research/does not hold an Academic Appointment)
      - d) Formally involved in research (allocated time to undertake research/holds an Academic Appointment)

If you answered (a) 'Never involved in research' question stem: (Select all that apply)

- Why have you never been involved in research?
  - Not something that interests me
  - Lack of time
  - Lack of an adequate career pathway
  - Lack of funding
  - Lack of departmental support
  - Lack of resources
  - Lack of training
  - Other (please specify)
- Do you wish to become involved in research? Y/ N; if Y:
  - What are the barriers to you becoming involved in research? *(Select all that apply)*
    - a) Lack of time
    - b) Lack of an adequate career pathway
    - c) Lack of funding
    - d) Lack of departmental support
    - e) Lack of resources
    - f) Lack of training
    - g) Other (please specify)

- What would help you to become involved in research?

Open-ended response

If you answered (b) 'Have previously been involved in research, not currently research-active' question stem:

- At which stage in your career did you stop being involved in research?
  - a) After medical school
  - b) During training
  - c) Upon becoming a consultant
  - d) Early in your career as a consultant
  - e) Mid-consultant career
  - f) Late-consultant career
- Why did you stop being involved in research?

Open-ended question

- What are the barriers to you becoming involved in research? (*Select all that apply*)
  - a) Lack of time
  - b) Lack of an adequate career pathway
  - c) Lack of funding
  - d) Lack of departmental support
  - e) Lack of resources
  - f) Lack of training
  - g) Other (please specify)

- What would help you to become involved in research?

Open-ended response

If you answered (c) Currently involved in research, but on an 'informal' basis question stem:

- To what extent are you involved in research? (*Select all that apply*)
  - a) Clinical Trials: Chief Investigator
  - b) Clinical Trials: Supportive/collaborative role (contributes to studies but not the Chief Investigator)
  - c) Research other than Clinical Trials: Chief Investigator
  - d) Research other than Clinical Trials: Supportive/collaborative role (contributes to studies but not the Chief Investigator)
  - e) Member of a national research committee

- f) Supervise trainees/students undertaking research
- g) Other (please specify)

- What level of support do you receive for your research? (*Select all that apply*)
  - a) funding
  - b) remunerated academic sessions
  - c) secretarial support
  - d) pathology trainees or other medical students
  - e) Part of Appraisal target setting
  - f) Other (please specify)

- Why are you not 'formally' undertaking research?

Open-ended response

- What are the barriers to you undertaking research? (*Select all that apply*)
  - a) Lack of time
  - b) Lack of an adequate career pathway
  - c) Lack of funding
  - d) Lack of departmental support
  - e) Lack of resources
  - f) Lack of training
  - g) Other (please specify)

- What would help you to increase your formal involvement in research?

Open-ended question

If you answered (d) Formally involved in research question stem:

- Do you have an Academic Appointment?
    - N
    - Y; if Y:
      - Is your appointment 'honorary'? Y/N
      - What is your appointment?
        - a) Lecturer
        - b) Clinical Lecturer
        - c) Senior Lecturer
        - d) Reader
        - e) Professor
          - With which institution is your appointment?
- Open-ended response
- What proportion of your Academic Appointment is for research (as opposed to teaching)?

Open-ended response

- To what extent are you involved in research? (*Select all that apply*)
  - a) Clinical Trials: Chief Investigator
  - b) Clinical Trials: Supportive/collaborative role (contributes to studies but not the Chief Investigator)
  - c) Research other than Clinical Trials (e.g. observational/basic/translational research): Chief Investigator
  - d) Research other than Clinical Trials (e.g. observational/basic/translational research): Supportive/collaborative role (contributes to studies but not the Chief Investigator)
  - e) Member of a national research committee
  - f) Leads own research group
  - g) Supervise trainees/students undertaking research
  - h) Other (please specify)

- What funding do you receive for your research? (*Select all that apply*)

Predominantly funded by...

- a) NHS
- a) NIHR
- b) CRUK
- c) PathSoc
- d) Wellcome Trust
- e) MRC
- f) Local funding
- g) Other (please specify)

- What percentage of your time is spent on research?

Open-ended response

- Are you aware of the Research Assessment Exercise and the Research Excellence Framework?

- a) Y
- b) N

- Does consideration of the REF influence your work goals? If so in what way?

Open-ended response

- What criteria does your Institute/Department have to define an individual as returnable in the RAE/REF?

Open-ended response

- Have you been returned in a RAE/REF?
  - a) Y
  - b) N

- Were you returnable in the last RAE/RAF?
  - a) Y
  - b) N
- Were any pathologists in your institute/department returned for the last RAE/RAF?
  - a) Y
  - b) N
  - c) Don't know
- Do you think you will be returnable in the next REF?
  - a) Y
  - b) N
  - c) Don't know
- Do you think REF accurately assesses the productivity and value of academic pathologists?
  - a) Y
  - b) N
  - c) Comments
- Do you think it is important to have a measure of academic output?
  - a) Y
  - b) N
  - c) Comments
- Has the RAE/REF influenced your decision to take an academic post? If so, in what way?
  - a) Y
  - b) N
  - c) Comments
- Has the RAE or will the REF have an impact on the security of your academic post? If so, in what way?
- What are the barriers to you undertaking research? (*Select all that apply*)
  - Lack of time
  - Lack of an adequate career pathway
  - Lack of funding
  - Lack of departmental support
  - Lack of resources
  - Lack of training
  - Other (please specify)
- What would help you to increase your involvement in research?

#### Open-ended response

- What is your career goal? (*Select all that apply*)
  - a) Professorship
  - b) Principal Investigator
  - c) Run your own group
  - d) NHS Consultant with dedicated academic time
  - e) Other (please specify)

## Molecular Pathology

- Regarding molecular pathology, which option best describes you:  
(*Select all that apply*)
  - a) I do not use molecular pathology in my NHS diagnostic work
  - b) I am starting to use molecular pathology in my NHS diagnostic work
  - c) I use molecular pathology a lot in my NHS diagnostic work
  - d) I am involved in the delivery of molecular pathology services
  
- How important do you think molecular pathology will be in the remainder of your career?
  - a) Not important, I am reaching the end of my career
  - b) Not important as not relevant to my specialty
  - c) Increasingly important
  - d) Essential
  - e) Hard to say
  
- How have you been trained in molecular pathology? (*Select all that apply*)
  - a) Yes formally
  - b) Yes informally
  - c) No
  - d) Comments
  
- What training would you like to receive? (*Select all that apply*)
  - a) Bioinformatics
  - b) Genomics
  - c) Ethics/Legal
  - d) Statistics
  - e) Biomarker validation
  - f) Digital pathology
  - g) Pharmacogenomics
  - h) Genome-based therapies
  - i) Other (please specify)
  
- How would you want molecular pathology training to be delivered?
  - a) Online/face-face
  - b) Locally/nationally
  - c) Specialty-specific training
  - d) 1-day course/ 2-3-day course/week course/ MSc
  - e) One off course/annual
  - f) Other (please specify)

- How much molecular pathology support do you receive? (*Select all that apply*)
  - a) None
  - b) Local symposia
  - c) Local Training
  - d) Local support interpreting reports
  - e) Online courses
  - f) HEE funded course
  - g) Other (please specify)
- What do you perceive to be the barriers to becoming trained in molecular pathology? (*Select all that apply*)
  - a) Lack of training available
  - b) Lack of time
  - c) Lack of funding
  - d) Lack of interest
  - e) Other (please specify)
- Are you Head of Department?
  - a) Y
  - b) N

Please email Jessica ([Jessica.Lee@ncri.org.uk](mailto:Jessica.Lee@ncri.org.uk)) with overall statistics for the department:

- Please provide details of the number of academic posts in your department (including:)
    - a) FY1/FY2
    - b) ACF
    - c) CL
    - d) OOPR
    - e) Clinician scientists
    - f) Associated professors
    - g) Full professors
    - h) Other
  - Please provide details of numbers of NHS Consultants with academic PA's
  - Please provide details of numbers of Consultant Clinical Scientists with Academic Appointments
- d. Please provide your email address if you are happy for the CM-Path programme to contact you
